# Supplementary material
Source: publisher site journal article supplement (https://www.spandidos-publications.com/4539/downloadSupplementary)

Figure S1. ROC curve for angiotensin-like 4 level to discriminate patients with lung metastasis from patients with no metastasis. The area under the ROC curve was 0.9450. ROC, receiver operating characteristic.

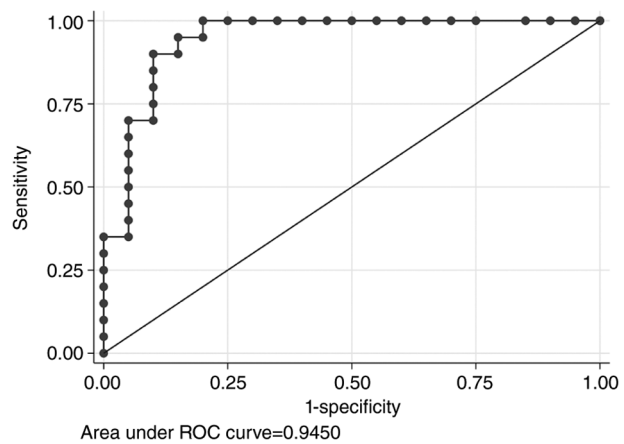

Figure S2. ROC curve for angiopoietin-like 4. The optimal cut-point was indicated by a single mark on the ROC curve. ROC, receiver operating characteristic.

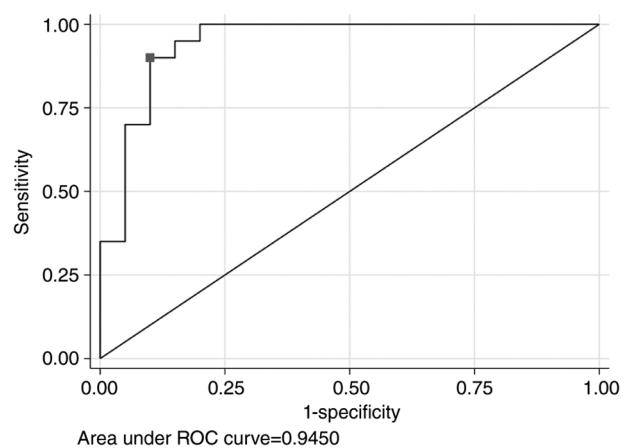

Supplement: Supplementary file 1 [file downloadSupplementary]
